# Supplementary material for: Prostate cancer cell‐intrinsic interferon signaling regulates dormancy and metastatic outgrowth in bone
Source: PubMed Central journal article supplement — EMBO Rep. 2020 Apr 21;21(6):e50162. doi: 10.15252/embr.202050162 (PMC7271653; doi:10.15252/embr.202050162), 2020-04-21
Supplement: EMBR-21-e50162-s001.pdf [file EMBR-21-e50162-s001.pdf]

## APPENDIX CONTENTS

|                         |         |
|-------------------------|---------|
| Appendix Figure S1..... | page 2  |
| Appendix Figure S2..... | page 5  |
| Appendix Figure S3..... | page 6  |
| Appendix Figure S4..... | page 7  |
| Appendix Figure S5..... | page 10 |
| Appendix Figure S6..... | page 11 |
| Appendix Figure S7..... | page 12 |

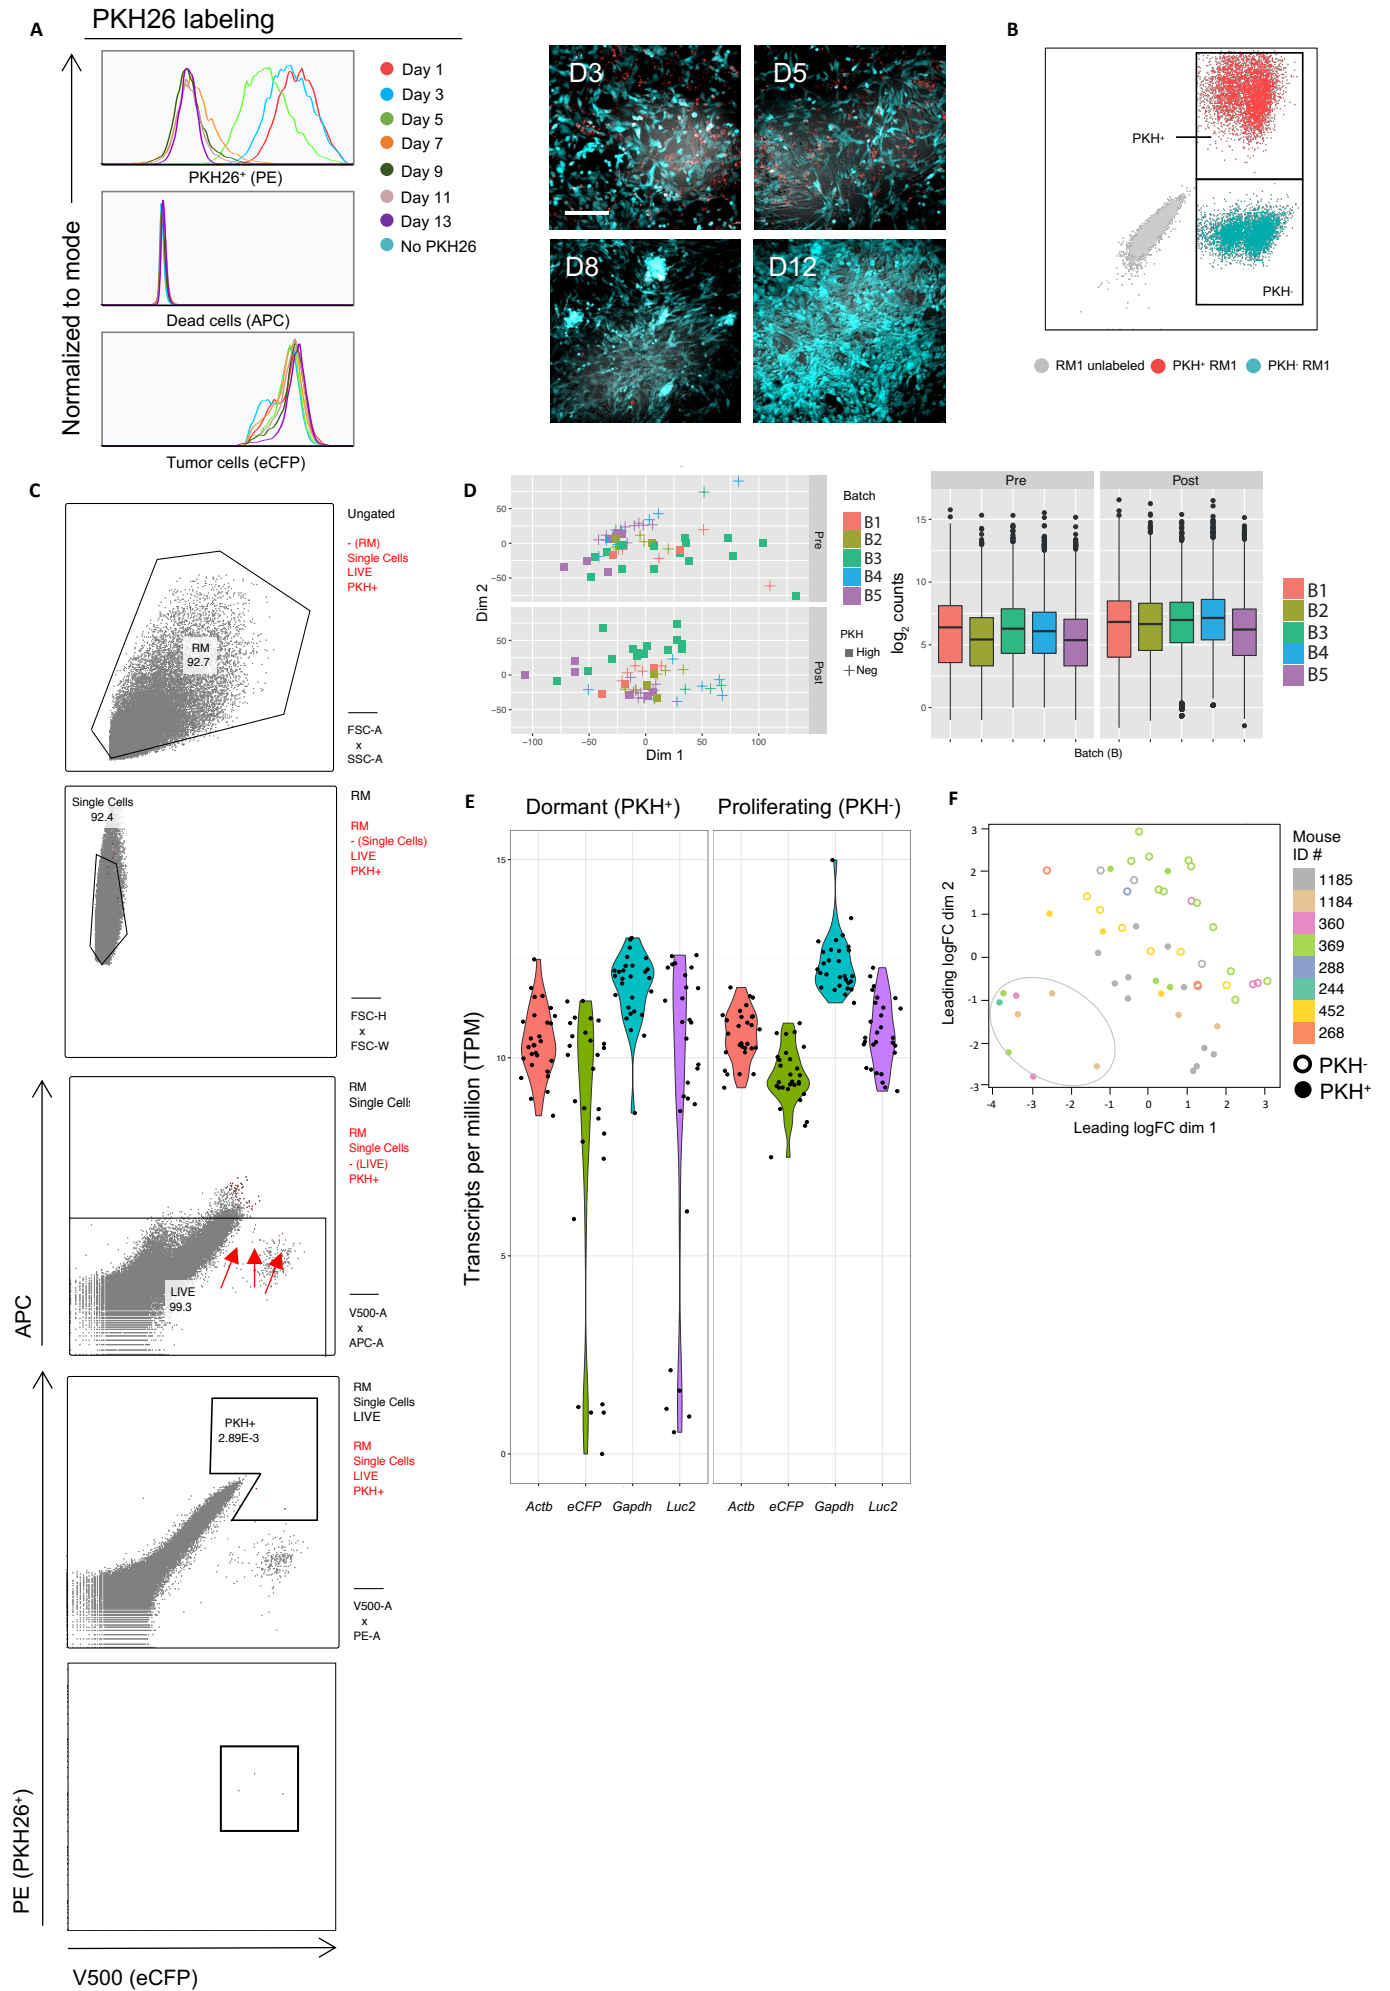

G

DE IRGs enriched in matched dormant RM1 cells

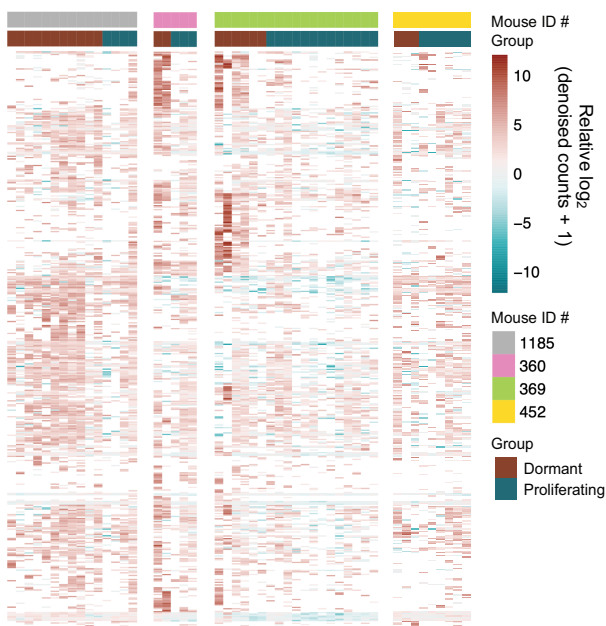

H

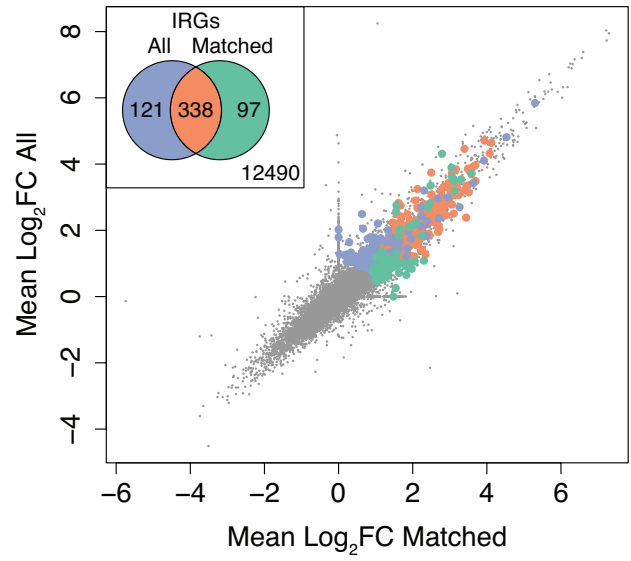

I

GO biological process alterations (matched cells)

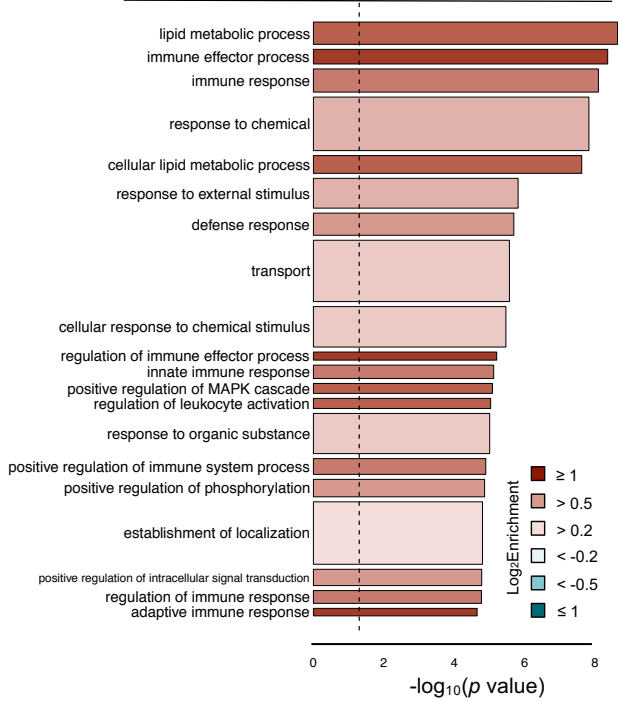

J

Dormancy-associated IRGs  
in PKH<sup>+</sup> RM1

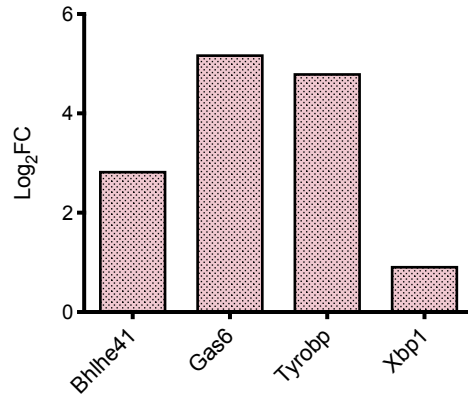

### Appendix Figure S1 Type I IFN signaling is retained in dormant PCa cells in bone metastases

Optimization of PKH26 labeling of RM1 (eCFP/*luc2*<sup>+</sup>) parental cells and isolation of bone-derived PKH26<sup>+</sup> single cells for RNAseq. Time course of PKH26 retention in RM1 parental cells by (A) flow cytometry (left) and confocal microscopy (right) at days (*D*) indicated. RM1 cells are eCFP (V500) and PKH26 (PE) positive and live RM1 cells are APC negative. Scale bar, 50  $\mu$ m. (B) Representative FACS plot and (C) dormant (PKH/PE<sup>+</sup>) cell detection back-gating of live (APC<sup>-</sup>) RM1 (V500<sup>+</sup>) cells. Live dormant (APC<sup>-</sup>/V500<sup>+</sup>/PKH<sup>+</sup>) RM cells are indicated by red arrows and represented as red 'dots' within back-gating plots. (D) PCA clustering of dormant and proliferating RM1 populations pre- and post-normalization with box plots of the distributions of log<sub>2</sub> counts shown (right). (E) Transcript profiles of RM1-specific reporter genes cerulean (*eCFP*) and *luc2* expressed in individual dormant and proliferating RM1 cells. *Actb* and *Gapdh* housekeeper controls shown. (F) Multidimensional scaling (MDS) plot of log<sub>2</sub>(denoised counts + 1) from all dormant and proliferating cells, using *plotMDS* (limma). (G) Heatmap of BASiCS-derived log<sub>2</sub>(denoised counts + 1) for type I IRGs (upregulated > 2-fold in the INTERFEROME) that are differentially expressed between matched dormant and active populations from the same mice. Only IRGs with no residual over-dispersion shown. Samples with zero counts for individual genes are represented in white. Mice numbers (#) indicated. (H) Dot plot of mean log<sub>2</sub>fold change (FC) for DEGs enriched in all dormant cells versus dormant cells from hosts with matched proliferating RM1 cells. Type I IRGs shown in color with overlapping and unique IRGs indicated on the Venn inset. (I) *goana* GO analysis (limma) of DE genes enriched in matched PKH<sup>+</sup> cells from individual mice (*n* = 4; 22 dormant RM1 cells; 26 proliferating RM1 cells). Gene sets appear in order of significance (*p* value) with color representing FE and bar width indicating the number of genes in each process. (J) log<sub>2</sub>FC of IRGs enriched in PKH<sup>+</sup> cells specifically linked to dormancy.

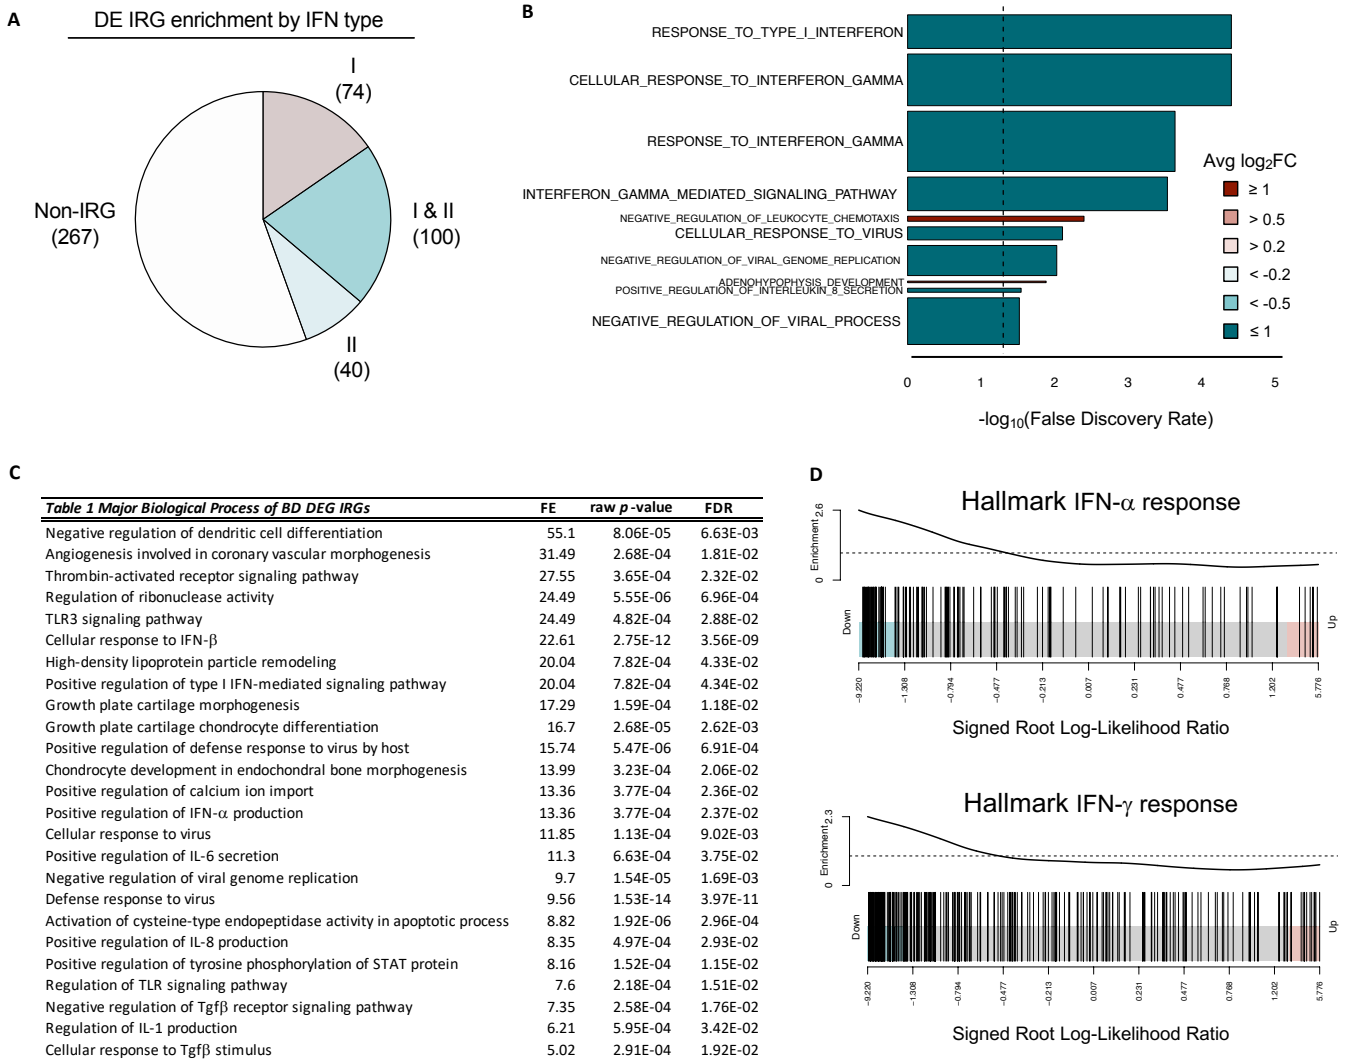

**Appendix Figure S2 Intrinsic type I IFN pathways are specifically suppressed in proliferating PCA cells from bone** (A) INTERFEROME database classification of differentially expressed (DE) genes retained in proliferating RM cells compared to parental cells into type I and/or II IFN regulated genes (IRGs). (B) Most significant gene ontology (GO) biological processes from the Broad MSigDB c5 GO gene set collection associated with bone metastasis compared to parental cells. Bar length is the  $-\log_{10}$ FDR (false discovery rate). Color indicates the mean  $\log_2$ fold change (FC) of all genes in the gene set and bar width indicates relative gene set size. The dashed line represents FDR = 0.05. (C) Major biological processes enriched in DE IRGs in RM1 (PKH<sup>-</sup>) cells derived from bone compared to parental RM1 cells determined by PANTHER analysis. Significance was determined by Fisher's Exact test with FDR ( $< 0.05$ ) multiple test correction. (D) Barcode plot of the Hallmark IFN- $\alpha$  and  $\gamma$  response gene sets using the signed log-likelihood ratio statistic from edgeR for bone metastases-derived cells versus lung. Bars indicate statistic value for each gene in the gene set.

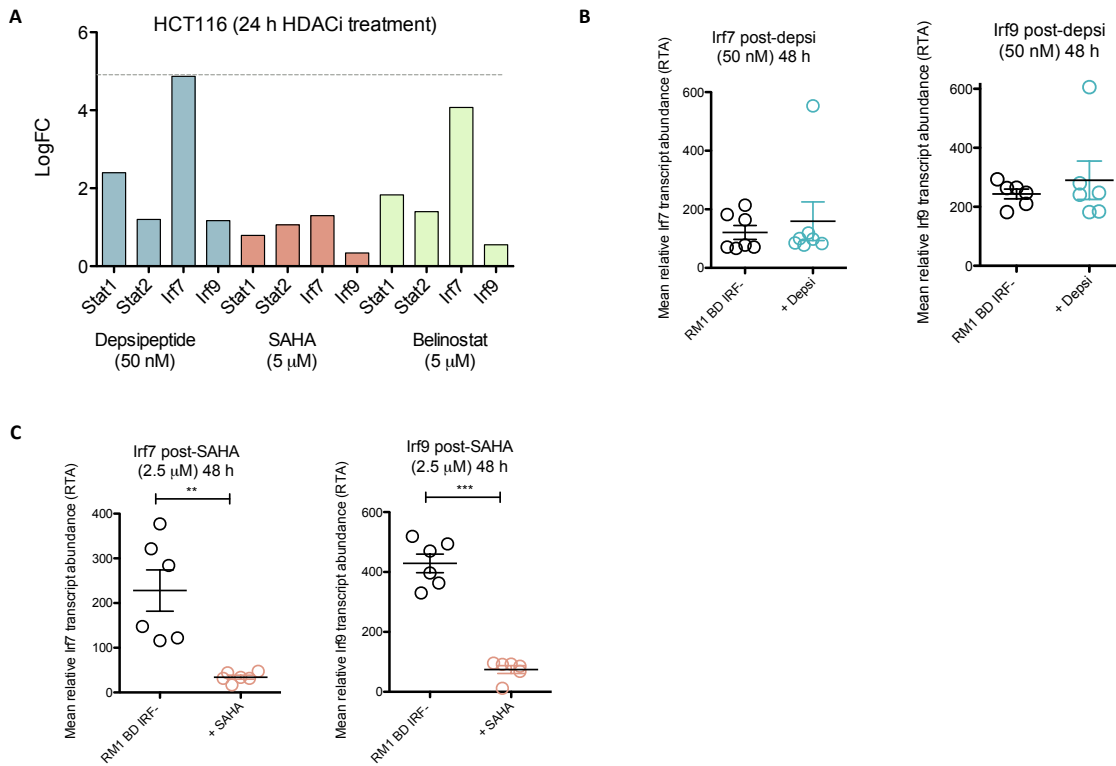

**Appendix Figure S3 Loss of tumor-intrinsic type I IFN is inducible by bone marrow cells and is reversed through HDACi modulation** (A) Microarray analysis of log<sub>2</sub>FC IFN-pathway gene expression values following ± 24 h treatment of HCT116 cells with HDACi Dapsipeptide (50 nM; blue), SAHA (5 mM; orange) and Belinostat (5 mM; green) (*n* = 1). qRT-PCR of *Irf7* and *Irf9* expression in RM1 BD Irf cells following ± 48 h treatment with selective class I HDACi (B) dapsipeptide or (C) pan-HDACi SAHA. Values are means ± SEM of three independent experiments. *p* values represented as \* < 0.05, \*\* < 0.005 and \*\*\* < 0.0005 (Student's *t* test). All error bars ± SEM.

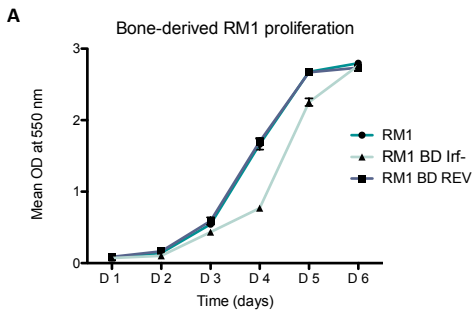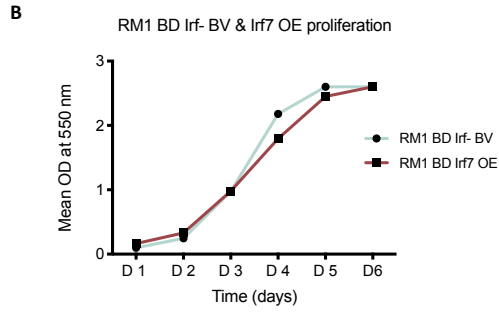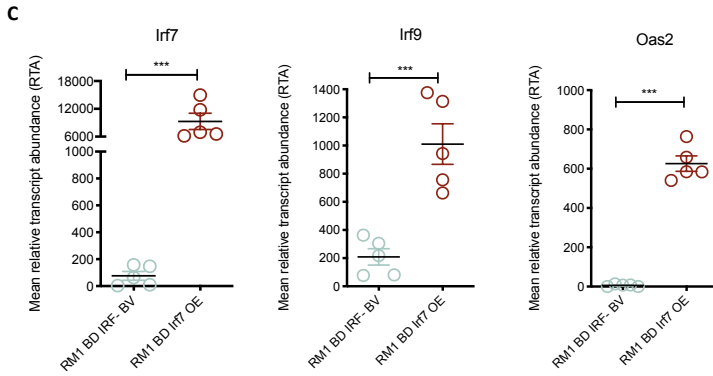

**D** WT D8 post-IC injection

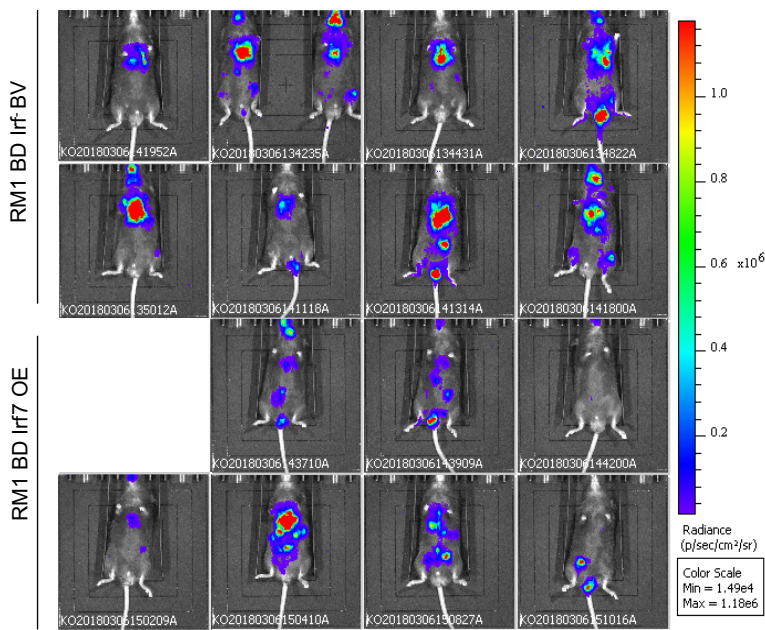

**E** WT endpoint

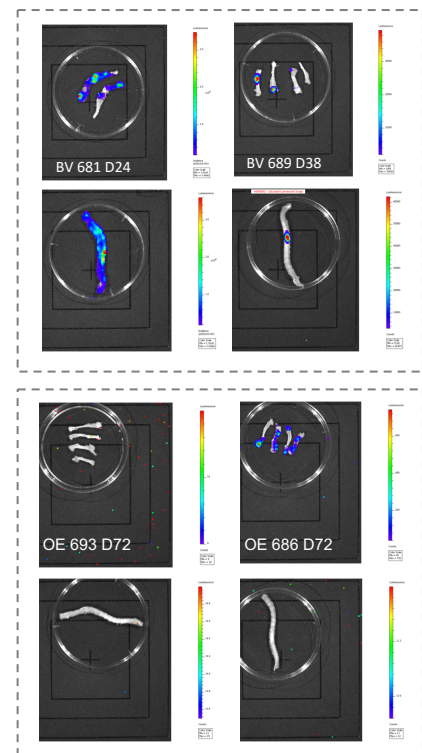

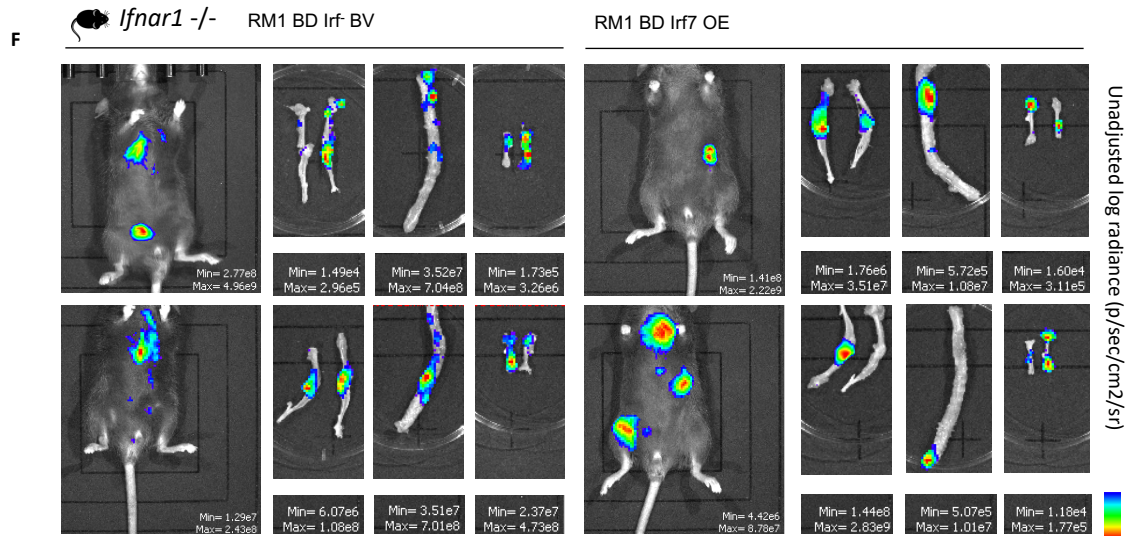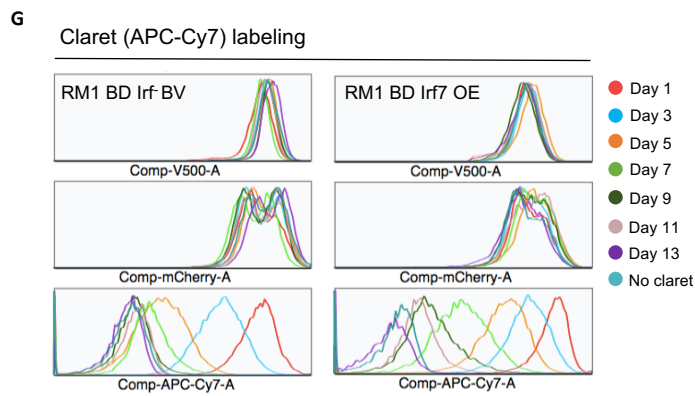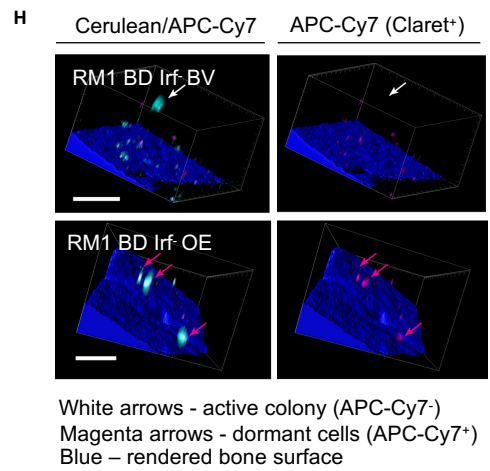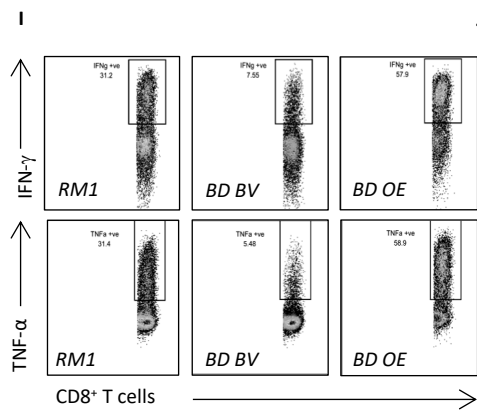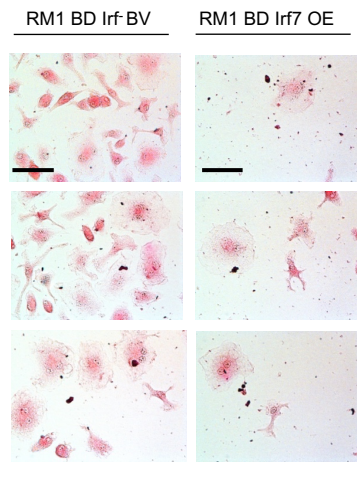

+ naive BM  
+ m-CSF (50 ng/ml)



**Appendix Figure S4 Impact of differential tumor-intrinsic IFN signaling on metastasis, dormancy and bone remodeling** (A) Proliferation over time (days; D) in RM1 parental cells, RM1 bone-derived *Irf*-low cells (RM1 BD *Irf*) and reverted bone-derived late-passage (LP) cells (RM1 BD REV) determined by SRB assay. Mean optical density (OD) measured at 550 nm. (B) SRB assay of proliferation in RM1 BD *Irf* base-vector (BV) and *Irf7* overexpressing (OE) cell lines over 6 days. Mean OD measured at 550 nm. (C) qRT-PCR of *Irf7*, *Irf9* and *Oas2* upregulation in RM1 BD *Irf7* OE compared to RM1 BD *Irf* BV cells ( $n = 5$ ). (D) Whole mouse bioluminescence imaging showing signal in all but one animal at day 8 post-IC injection of RM1 BD *Irf* BV ( $n = 9$ ) and RM1 BD *Irf7* OE ( $n = 7$ ) cells. (E) Representative bioluminescence endpoint (D24-72) imaging of legs and spines from RM1 BD *Irf* BV and RM1 BD *Irf7* OE tumor-bearing mice. (F) Representative bioluminescence endpoint (D9-12) imaging of whole mouse, legs (representative images shown in Fig 4E), humerus and spines from RM1 BD *Irf* BV and RM1 BD *Irf7* OE tumor-bearing *Irfar1*  $-/-$  mice. (G) FACS time course of claret (APC-Cy7) label retention in eCFP/mCherry<sup>+</sup> RM1 BD *Irf* BV and RM1 BD *Irf7* OE cells. (H) Multiphoton detection of dormant (cerulean (eCFP)/claret<sup>+</sup>) and proliferating (eCFP<sup>+</sup>) cells in whole bone at day 17 post-IC injection of RM1 BD *Irf* and RM1 BD *Irf7* OE cells ( $n = 4$  per group). White arrows indicate proliferating (APC-Cy7<sup>-</sup>) colonies. Magenta arrows indicate dormant (APC-Cy7<sup>+</sup>) single cells. Blue represents rendered bone surface. Scale bars, 50  $\mu$ m. (I) Representative FACS plots of IFN- $\gamma$ <sup>+</sup> and TNF- $\alpha$ <sup>+</sup> CD8<sup>+</sup> T cells (%) post-ICS induction of T cell (spleen-derived from tumor-bearing mice) activation by RM1 parental, RM1 BD *Irf* BV and RM1 BD *Irf7* OE cells ( $n = 3$  per condition/group). (J) Representative TRAP-staining of triplicate-plated osteoclasts differentiated with M-CSF in co-culture with RM1 BD *Irf* and RM1 BD *Irf7* OE cells ( $n = 3$  per condition; main representative images shown in Fig 4K). Scale bar, 100  $\mu$ m.  $p$  values represented as \*\*\*  $< 0.0005$  (Student's  $t$  test). All error bars  $\pm$  SEM.

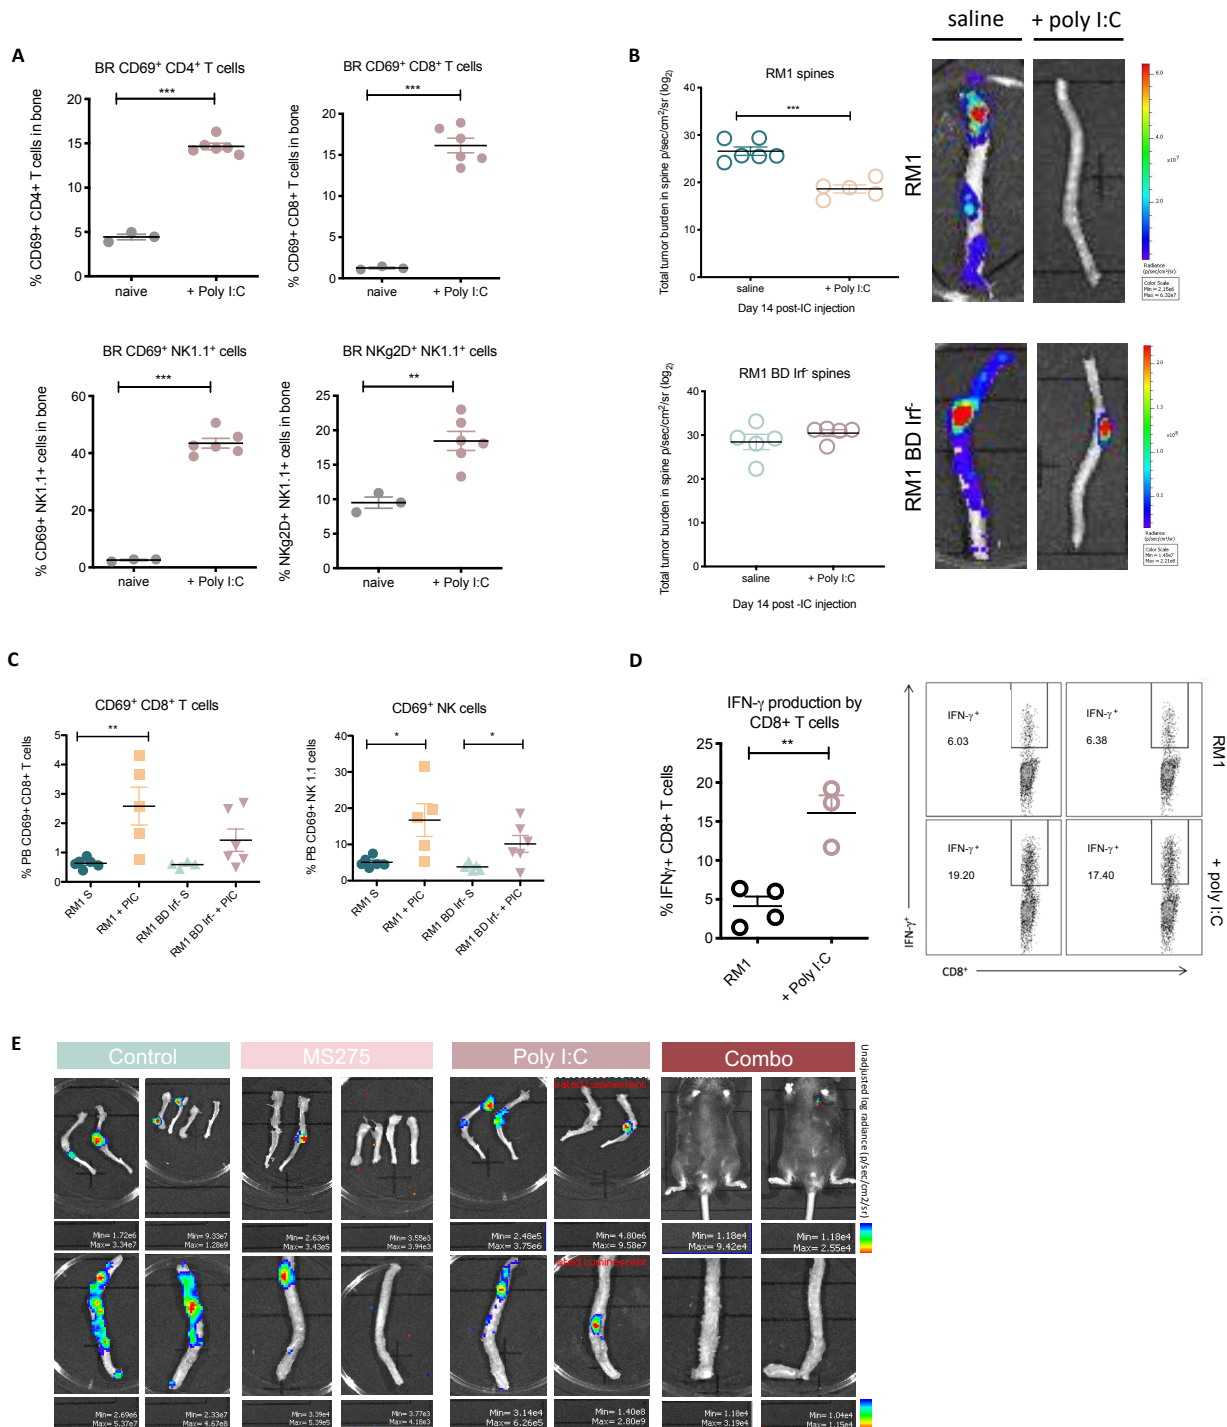

**Appendix Figure S5 Bone metastasis is inhibited by therapeutic induction of cell-intrinsic (HDACi) and systemic type I IFN and promotes long-term immune reactivity** (A) FACS analysis of immune activation of bone-resident (BR) cells derived from femur, spine, tibia and humerus post-24 h *in vivo* poly I:C treatment (25 mg/mouse) in non-tumor bearing C57BL/6 mice ( $n = 3$ ). (B) Tumor burden in spine at day 14 post-IC injection of RM1 parental and RM1 BD Irf cells as measured by bioluminescent intensity score ( $\log_2$  p/sec/cm<sup>2</sup>/sr) with values  $< 4.0 \times 10^4$  representing zero burden ( $n = 5$  per group). (C) FACS analysis of peripheral blood (PB) CD8<sup>+</sup> T cell and NK cell activation at day 8 post-IC injection of RM1 parental and RM1 BD Irf cells. (D) FACS analysis of IFN- $\gamma$ <sup>+</sup> CD8<sup>+</sup> T cells (%) post-ICS induction of T cell activation by RM1 parental cells  $\pm$  poly I:C ( $n = 3$  per condition). (E) Representative bioluminescence endpoint (D9-42) imaging of whole mouse and/or legs and spines from RM1 BD Irf animals  $\pm$  MS275, poly I:C or combination treatment from day 3 post-IC injection ( $n = 6$  per group).  $p$  values represented as \*\*  $< 0.005$  and \*\*\*  $< 0.0005$  (Student's  $t$  test). All error bars  $\pm$  SEM.

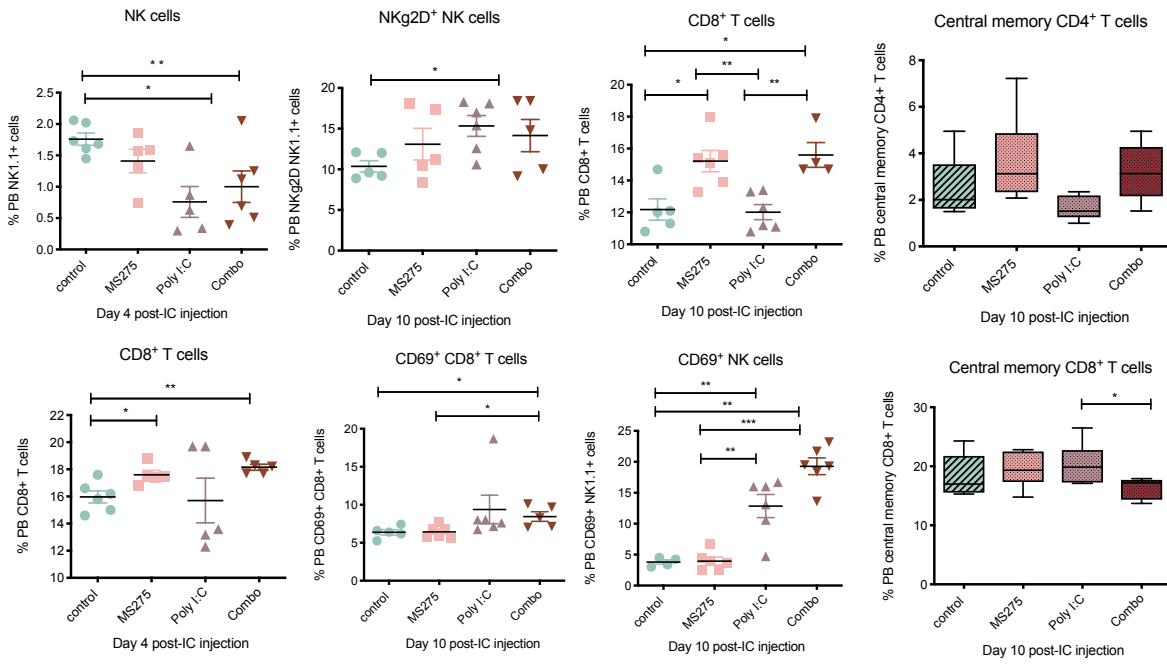

**Appendix Figure S6 HDACi and systemic IFN induction provides long-term immune protection from bone-metastatic colonization and outgrowth** FACS analysis of peripheral blood (PB) lymphocytes (%) at day 4 and 10 post-IC injection of RM1 BD Irf cells  $\pm$  MS275, poly I:C or combination treatment ( $n = 4-6$  per group).  $p$  values represented as \*\*  $< 0.005$  and \*\*\*  $< 0.0005$  (Student's  $t$  test). All error bars  $\pm$  SEM.

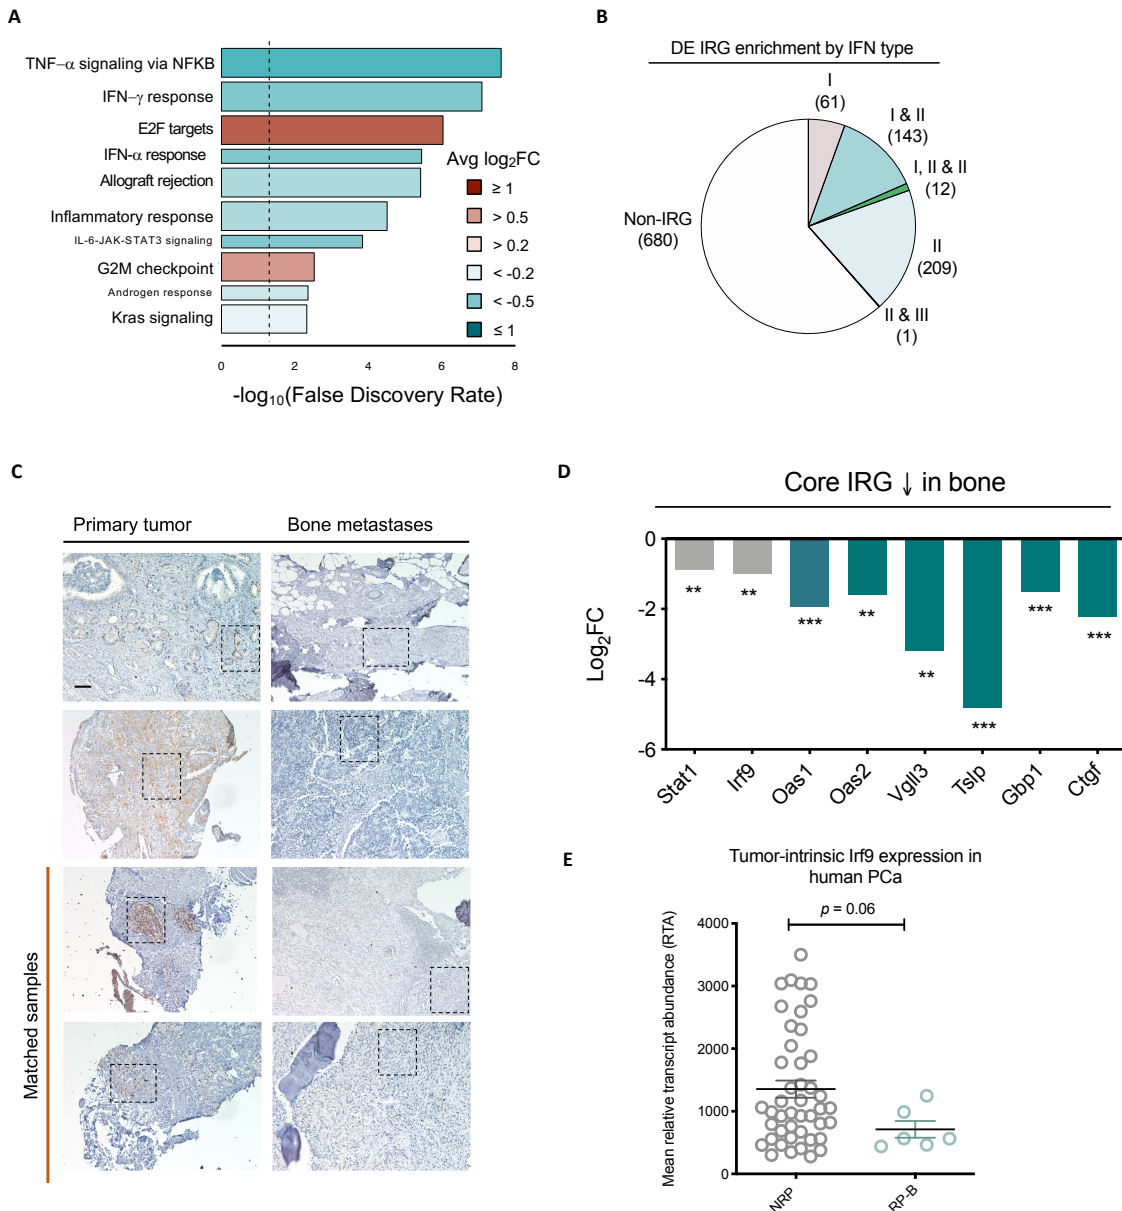

**Appendix Figure S7 IFN signaling is decreased in bone-metastatic Pca** (A) Hallmark gene set responses associated with bone metastasis by camera analysis. Bar length is the  $-\log_{10}$ FDR. Color indicates mean  $\log_2$ FC of all genes in gene set. Bar width is relative gene set size. Dashed line shows FDR = 0.05. (B) Interrogation of suppressed type I, II and III IRGs in bone metastases using the INTERFEROME database. (C) Full-face IHC detection of IRF9 expression in primary prostate tumors and bone metastases with matched samples indicated. IRF9 staining represented by brown (DAB) staining. Scale bar represents 100  $\mu$ m. Corresponding Fig 7E regions boxed in black. (D)  $\log_2$ FC of an 8-IRG core signature suppressed in bone metastases, including genes directly involved in IFN- $\alpha/\beta$  production (grey) and classic downstream targets (blue). GLM by edgeR. (E) Primary tumor-intrinsic expression of *Irf9* in non-recurrent primaries (NRP;  $n = 45$ ) and recurrent primaries with bone metastases (RP-B;  $n = 6$ ) from the St Vincent's-Garvan Clinical cohort (Gleason scores  $>7$ ). Significance ( $p = 0.06$ ) determined by Mann-Whitney U test.
